# Supplementary material
Source: MDPI journal article supplement (https://www.mdpi.com/1424-8247/15/12/1575)

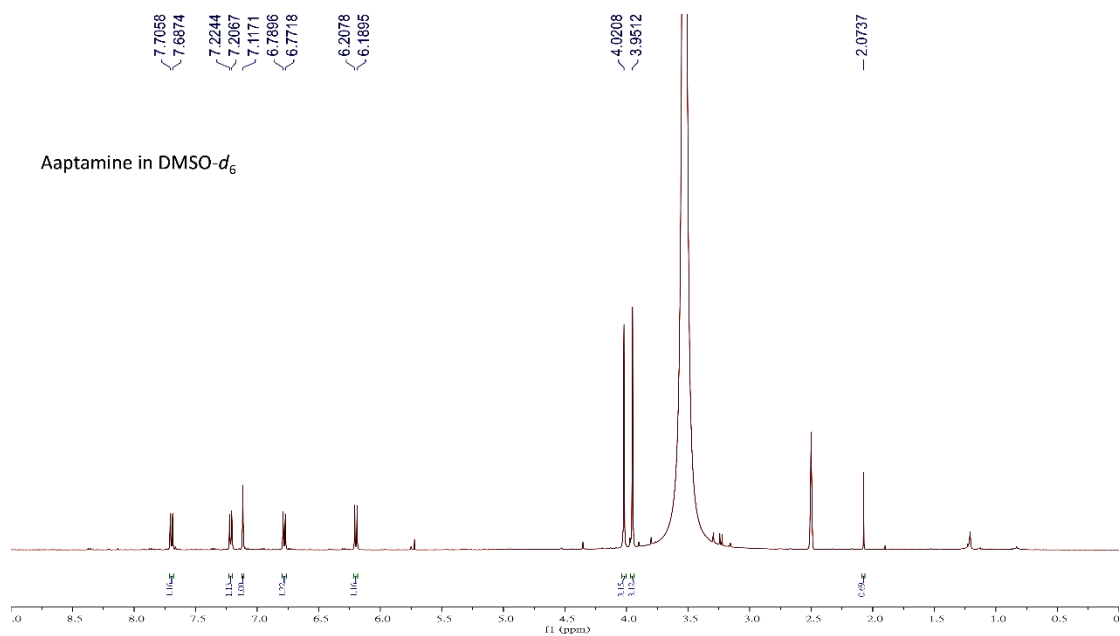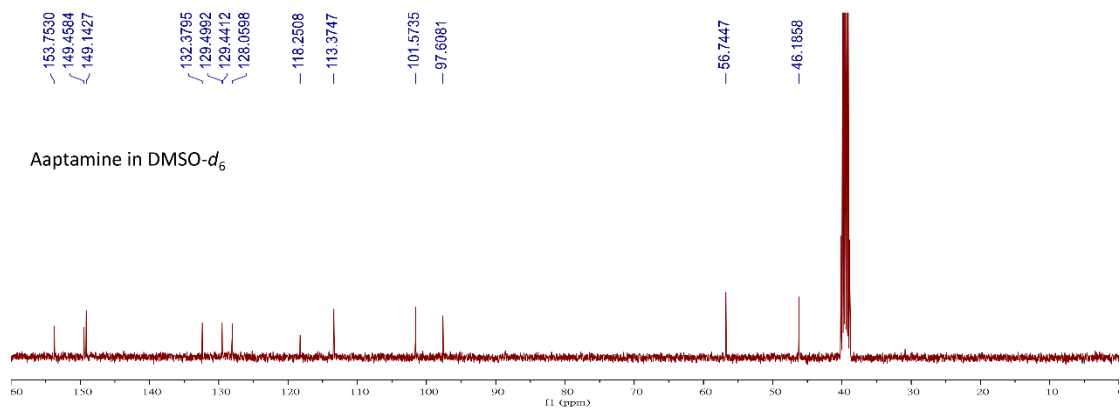

**Supplementary Figure S1.**  $^1\text{H}$  and  $^{13}\text{C}$  NMR spectra of aptamine.

Supplement: s1 [file s1]
